# Supplementary material for: Correlating measurements across samples improves accuracy of large-scale expression profile experiments
Source: Springer Nature journal article supplement (doi:10.1186/gb-2009-10-12-r143), 2009-01-01
Supplement: Additional file 3 [file gb-2009-10-12-r143-s3.pdf]

**Supplementary Table 2** List of probes mapping to FOXM1 and MYB according to Affymetrix and Cleaner annotations.

Columns show the probe-set defined by Affymetrix, probe sequences, mapping to current RefSeq database (Remap), probe-clusters generated by Cleaner (Cleaner), and consistency score for each probe (consistency). Consistency scores lower than the 99 percentile of the permutation-based null distribution, 0.632 for FOXM1 and 0.532 for MYB, are shown between square brackets. (\*) Probes removed by the clustering analysis. (<sup>RC</sup>) Map to the reverse complement.

| probe_set | Probe # | sequence                   | Remap               | Cleaner | consistency |
|-----------|---------|----------------------------|---------------------|---------|-------------|
| FOXM1     |         |                            |                     |         |             |
| 34715_at  | 1       | CTTTGCAGGGTGGTCCGTGTAATA   | FOXM1               | 2305.1  | 0.84        |
|           | 2       | GGTTTCAATTGACTTCTGTTCCTTG  | FOXM1               | 2305.1  | 0.91        |
|           | 3       | GCAGTGCACGGTTTCTTCCAGGCTG  | FOXM1               | 2305.1  | 0.93        |
|           | 4       | GTTCTTCACTGCAGGGACCCAGACA  | FOXM1               | 2305.1  | 0.9         |
|           | 5       | AGGGACCCAGACAAGTGGATCTGCT  | FOXM1               | -       | 0.65*       |
|           | 6       | CCAGACAAGTGGATCTGCTTGCCAG  | FOXM1               | 2305.1  | 0.83        |
|           | 7       | ATCTGCTTGCCAGAGTCCTTTTTGC  | FOXM1               | 2305.1  | 0.89        |
|           | 8       | TTCCAAGTCAGCTTTCCTGCAAGAA  | FOXM1               | 2305.1  | 0.94        |
|           | 9       | TCCTGCAAGAAGAAATCCTGGTTAA  | FOXM1               | 2305.1  | 0.76        |
|           | 10      | TGTGGGTGCCCAGATGTGCGCTATT  | FOXM1               | 2305.1  | 0.94        |
|           | 11      | GGGTGCCCAGATGTGCGCTATTAGA  | FOXM1               | 2305.1  | 0.94        |
|           | 12      | CCAGATGTGCGCTATTAGATGTTTC  | FOXM1               | 2305.1  | 0.91        |
|           | 13      | TCATACCAGGGAGACTGGCATTGAC  | FOXM1               | 2305.1  | 0.76        |
|           | 14      | GACTGGCATTGACGAGAACTCAGGT  | FOXM1               | 2305.1  | 0.93        |
|           | 15      | AAAGGGCCCCTGACCTGCCTGGCTT  | FOXM1               | -       | [0.37]      |
|           | 16      | GACCTGCCTGGCTTCCTTAGCTTGC  | FOXM1               | -       | [0.55]      |
| 41323_at  | 17      | CAAAGATCAGGGAAGGCTGGATTTTC | -                   | -       | -           |
|           | 18      | AAGGCTGGATTTCTTCCTCCTTGAT  | FOXM1 <sup>RC</sup> | -       | [0.51]      |
|           | 19      | CCTCAGCTAGCAGCACCTGAAAGGG  | -                   | -       | -           |
|           | 20      | AGCTAGCAGCACCTGAAAGGGAAAC  | -                   | -       | -           |
|           | 21      | AGCAGCACCTGAAAGGGAAACAGAG  | -                   | -       | -           |
|           | 22      | ATAAGGTGAACCAACGGTCACCAGA  | -                   | -       | -           |
|           | 23      | TAAGGTGAACCAACGGTCACCAGAC  | -                   | -       | -           |
|           | 24      | GTGAACCAACGGTCACCAGACAGGA  | -                   | -       | -           |
|           | 25      | CAACGGTCACCAGACAGGACGCACA  | -                   | -       | -           |
|           | 26      | TCACCAGACAGGACGCACAAAAATA  | -                   | -       | -           |
|           | 27      | CAGACAGGACGCACAAAAATATCAC  | -                   | -       | -           |
|           | 28      | AGGACGCACAAAAATATCACATACG  | -                   | -       | -           |
|           | 29      | GCACAAAAATATCACATACGGGTTTC | -                   | -       | -           |
|           | 30      | ATCACATACGGGTTCTGATCCTCTT  | -                   | -       | -           |
|           | 31      | GGGTTCTGATCCTCTTTGTGTCGTT  | -                   | -       | -           |

| probe_set  | Probe #                    | sequence                   | Remap               | Cleaner | consistency |
|------------|----------------------------|----------------------------|---------------------|---------|-------------|
|            | 32                         | CTGATCCTCTTTGTGTCGTTTTGAA  | -                   | -       | -           |
| 41324_g_at | 33                         | TATTTACACGGACCACCCTGCAAAG  | FOXMI <sup>RC</sup> | -       | [0.51]      |
|            | 34                         | ATTTACACGGACCACCCTGCAAAGA  | FOXMI <sup>RC</sup> | -       | [0.57]      |
|            | 35                         | CACGGACCACCCTGCAAAGATCAGG  | FOXMI <sup>RC</sup> | -       | [0.53]      |
|            | 36                         | ACCACCCTGCAAAGATCAGGGAAGG  | FOXMI <sup>RC</sup> | -       | [0.57]      |
|            | 37                         | AACAGGAGTTTCTCCTCTTTCCCTG  | FOXMI <sup>RC</sup> | -       | [0.46]      |
|            | 38                         | CAGGAGTTTCTCCTCTTTCCCTGGT  | FOXMI <sup>RC</sup> | -       | [0.45]      |
|            | 39                         | CTCTTTCCCTGGTCCTGCAGAAGAA  | FOXMI <sup>RC</sup> | -       | [0.52]      |
|            | 40                         | TCTTTCCCTGGTCCTGCAGAAGAAA  | FOXMI <sup>RC</sup> | -       | [0.39]      |
|            | 41                         | TTTCCCTGGTCCTGCAGAAGAAAGA  | FOXMI <sup>RC</sup> | -       | [0.37]      |
|            | 42                         | TCTTCTTGCAAGAAAGCTGACTTGG  | FOXMI <sup>RC</sup> | -       | [0.17]      |
|            | 43                         | TGCAGGAAAGCTGACTTGGAAACAC  | FOXMI <sup>RC</sup> | -       | [0.32]      |
|            | 44                         | AAAGCTGACTTGAAAACACGGGGAG  | FOXMI <sup>RC</sup> | -       | [0.28]      |
|            | 45                         | GGAATCTGGCAAGCAGATCCACTTG  | FOXMI <sup>RC</sup> | -       | [0.13]      |
|            | 46                         | GACTCTGGCAAGCAGATCCACTTGT  | FOXMI <sup>RC</sup> | -       | [0.44]      |
|            | 47                         | GGGTCCCTGCAGTGAAGAACCCAAG  | FOXMI <sup>RC</sup> | -       | [0.5]       |
|            | 48                         | CCCTGCAGTGAAGAACCCAAGATCC  | FOXMI <sup>RC</sup> | -       | [0.48]      |
|            | MYB                        |                            |                     |         |             |
| 1471_at    | 49                         | CCAACTGGGATGGCTCCTTGTGCTT  | -                   | -       | -           |
|            | 50                         | ACTGGGATGGCTCCTTGTGCTTTGC  | -                   | -       | -           |
|            | 51                         | GGGATGGCTCCTTGTGCTTTGCAAC  | -                   | -       | -           |
|            | 52                         | ATGGCTCCTTGTGCTTTGCAACATA  | -                   | -       | -           |
|            | 53                         | GCTCCTTGTGCTTTGCAACATACAT  | -                   | -       | -           |
|            | 54                         | CCTTGTGCTTTGCAACATACATAGT  | -                   | -       | -           |
|            | 55                         | AGCAGGTGCTACCATTATGTGGGCC  | -                   | -       | -           |
|            | 56                         | AGGTGCTACCATTATGTGGGCCATT  | -                   | -       | -           |
|            | 57                         | TGCTACCATTATGTGGGCCATTACT  | -                   | -       | -           |
|            | 58                         | GGCCATTACTGAATTCTGACATCTT  | -                   | -       | -           |
|            | 59                         | CATTACTGAATTCTGACATCTTTAG  | -                   | -       | -           |
|            | 60                         | TACTGAATTCTGACATCTTTAGCGA  | -                   | -       | -           |
|            | 61                         | TGAATTCTGACATCTTTAGCGACTG  | -                   | -       | -           |
|            | 62                         | ATTCTGACATCTTTAGCGACTGGGC  | -                   | -       | -           |
|            | 63                         | ACATCTTTAGCGACTGGGCAGCCAA  | -                   | -       | -           |
|            | 64                         | ACTGGGCAGCCAACCTGGGATGGCTC | -                   | -       | -           |
|            | 65                         | GCACACAAGAGACTGGGGAACAGAT  | MYB                 | -       | [0.36]      |
| 66         | AAAGCTACTGCCTGGACGAAGTAT   | MYB                        | 4602.1              | 0.79    |             |
| 67         | AACCACTGGAATTCTACAATGCGTC  | MYB                        | 4602.1              | 0.86    |             |
| 68         | GTTATCTGCAGGAGTCTTCAAAAGC  | MYB                        | 4602.1              | 0.7     |             |
| 69         | TCTTCAAAAAGCCAGCCAGCCAGCAG | MYB                        | -                   | [0.19]  |             |
| 70         | GCCAGCCAGCAGTGGCCACAAGCTT  | MYB                        | -                   | [0.25]  |             |
| 71         | TGGCCACAAGCTTCCAGAAGAACAG  | MYB                        | 4602.1              | 0.61    |             |

| probe_set | Probe #                    | sequence                   | Remap  | Cleaner | consistency |
|-----------|----------------------------|----------------------------|--------|---------|-------------|
| 1472_g_at | 72                         | TCCAGAAGAACAGTCATTTGATGGG  | MYB    | -       | [0.21]      |
|           | 73                         | TTGATGGGTTTTGCTCAGGCTCCGC  | MYB    | 4602.1  | 0.64        |
|           | 74                         | GCCCACTGTTAACAACGACTATTCC  | MYB    | 4602.1  | 0.79        |
|           | 75                         | ACGACTATTCCATTACCACATTTTC  | MYB    | 4602.1  | 0.87        |
|           | 76                         | TATTACCACATTTCTGAAGCACAAA  | MYB    | 4602.1  | 0.72        |
|           | 77                         | TGAAGCACAAAATGTCTCCAGTCAT  | MYB    | -       | [0.47]      |
|           | 78                         | CTCCAGTCATGTTCCATACCCTGTA  | MYB    | -       | [0.39]      |
|           | 79                         | TAGTCAATGTCCCTCAGCCAGCTGC  | MYB    | -       | [0.53]      |
| 1473_s_at | 80                         | CGCAGCCATTCAGAGACACTATAAT  | MYB    | 4602.1  | 0.74        |
|           | 81                         | TTCTTAAACACTTCCAGTAACCATG  | MYB    | 4602.1  | 0.72        |
|           | 82                         | TAAACACTTCCAGTAACCATGAAAA  | MYB    | 4602.1  | 0.72        |
|           | 83                         | CACTTCCAGTAACCATGAAAACCTCA | MYB    | 4602.1  | 0.73        |
|           | 84                         | CAGTAACCATGAAAACCTCAGACTTG | MYB    | -       | 0.61*       |
|           | 85                         | CCATGAAAACCTCAGACTTGGAAATG | MYB    | -       | [0.29]      |
|           | 86                         | ACTCAGACTTGGAAATGCCTTCTTT  | MYB    | 4602.1  | 0.8         |
|           | 87                         | TTGGAAATGCCTTCTTTAACTTCCA  | MYB    | -       | 0.58*       |
|           | 88                         | TCATTGGTCACAAATTGACTGTTAC  | MYB    | -       | [0.12]      |
|           | 89                         | TTGGTCACAAATTGACTGTTACAAC  | MYB    | -       | [0.26]      |
|           | 90                         | TCACAAATTGACTGTTACAACACCA  | MYB    | -       | [0.37]      |
|           | 91                         | AATTGACTGTTACAACACCATTTCA  | MYB    | 4602.1  | 0.85        |
|           | 92                         | GTTACAACACCATTTTCATAGAGACC | MYB    | 4602.1  | 0.8         |
|           | 93                         | ACAACACCATTTTCATAGAGACCAGA | MYB    | 4602.1  | 0.83        |
|           | 94                         | ACACCATTTTCATAGAGACCAGACTG | MYB    | 4602.1  | 0.82        |
|           | 95                         | CCATTTTCATAGAGACCAGACTGTGA | MYB    | 4602.1  | 0.66        |
| 96        | CATAGAGACCAGACTGTGAAAACCTC | MYB                        | -      | [0.5]   |             |
| 1474_s_at | 97                         | AGATGCACCGAATATTCTTACAAGC  | MYB    | 4602.1  | 0.89        |
|           | 98                         | GCACCAGCATCAGAAGATGAAGACA  | MYB    | -       | [0.53]      |
|           | 99                         | AGACAATGTTCTCAAAGCATTTACA  | MYB    | 4602.1  | 0.72        |
|           | 100                        | ATGTTCTCAAAGCATTTACAGTACC  | MYB    | 4602.1  | 0.8         |
|           | 101                        | TCTCAAAGCATTTACAGTACCTAAA  | MYB    | 4602.1  | 0.8         |
|           | 102                        | TACAGTACCTAAAAACAGGTCCCTG  | MYB    | -       | [0.21]      |
|           | 103                        | GAGCCCCTTGCAGCCTTGTTAGCAGT | MYB    | -       | [0.53]      |
|           | 104                        | CCCTTGCAGCCTTGTTAGCAGTACCT | MYB    | 4602.1  | 0.75        |
|           | 105                        | GCAGCCTTGTTAGCAGTACCTGGGAA | MYB    | 4602.1  | 0.76        |
|           | 106                        | AGTACCTGGGAACCTGCATCCTGTG  | MYB    | 4602.1  | 0.77        |
|           | 107                        | GAACCTGCATCCTGTGGAAAGATGG  | MYB    | 4602.1  | 0.74        |
|           | 108                        | AGCAGATGACATCTTCCAGTCAAGC  | MYB    | -       | 0.58*       |
| 109       | GATGACATCTTCCAGTCAAGCTCGT  | MYB                        | 4602.1 | 0.82    |             |
| 110       | CATCTTCCAGTCAAGCTCGTAAATA  | MYB                        | 4602.1 | 0.84    |             |
| 111       | TTCCAGTCAAGCTCGTAAATACGTG  | MYB                        | 4602.1 | 0.84    |             |
| 112       | GTCAAGCTCGTAAATACGTGAATGC  | MYB                        | 4602.1 | 0.84    |             |

| probe_set | Probe #                  | sequence                   | Remap                      | Cleaner | consistency |        |
|-----------|--------------------------|----------------------------|----------------------------|---------|-------------|--------|
| 1475_s_at | 113                      | CCACACCAGACCTCATGGAGACAGT  | MYB                        | 4602.1  | 0.67        |        |
|           | 114                      | GACCTCATGGAGACAGTGCACCTGT  | MYB                        | 4602.1  | 0.69        |        |
|           | 115                      | GGAGACAGTGCACCTGTTTCCTGTT  | MYB                        | -       | [0.28]      |        |
|           | 116                      | GTGCACCTGTTTCCTGTTTGGGAGA  | MYB                        | -       | [0.44]      |        |
|           | 117                      | GGGAGAACACCACTCCACTCCATCT  | MYB                        | -       | [0.5]       |        |
|           | 118                      | TCCTGGCTCCCTACCTGAAGAAAGC  | MYB                        | -       | [0.52]      |        |
|           | 119                      | TCCCTACCTGAAGAAAGCGCCTCGC  | MYB                        | -       | [0.37]      |        |
|           | 120                      | CGCCTCGCCAGCAAGGTGCATGATC  | MYB                        | 4602.1  | 0.66        |        |
|           | 121                      | GCCAGCAAGGTGCATGATCGTCCAC  | MYB                        | 4602.1  | 0.79        |        |
|           | 122                      | GTGCATGATCGTCCACCAGGGCACC  | MYB                        | 4602.1  | 0.77        |        |
|           | 123                      | GATCGTCCACCAGGGCACCATTCTG  | MYB                        | 4602.1  | 0.71        |        |
|           | 124                      | CACCAGGGCACCATTCTGGATAATG  | MYB                        | 4602.1  | 0.67        |        |
|           | 125                      | GGCACCATTCTGGATAATGTTAAGA  | MYB                        | 4602.1  | 0.69        |        |
|           | 126                      | TAAGAACCTCTTAGAATTTGCAGAA  | MYB                        | -       | [0.49]      |        |
|           | 127                      | AGAACCACACATGCAGCTACCCCGG  | MYB                        | -       | [0.49]      |        |
|           | 128                      | CCCGGGTGGCACAGCACCACCATTG  | MYB                        | -       | [0.44]      |        |
|           | 1476_s_at                | 129                        | AGCTATCAAAAAGGTCAATCTTAGAA | MYB     | -           | [0.22] |
|           |                          | 130                        | CAATCTTAGAAAAGCTCTCCAAGAAC | MYB     | -           | [0.48] |
| 131       |                          | GAAAGCTCTCCAAGAACTCCTACAC  | MYB                        | 4602.1  | 0.7         |        |
| 132       |                          | TCCAAGAACTCCTACACCATTCAAA  | MYB                        | -       | [0.36]      |        |
| 133       |                          | CATTCAAACATGCACTTGCAGCTCA  | MYB                        | 4602.1  | 0.87        |        |
| 134       |                          | TGCACTTGCAGCTCAAGAAATTTAAA | MYB                        | -       | 0.58*       |        |
| 135       |                          | TACGGTCCCCTGAAGATGCTACCTC  | MYB                        | 4602.1  | 0.64        |        |
| 136       |                          | TGAAGATGCTACCTCAGACACCCTC  | MYB                        | 4602.1  | 0.57        |        |
| 137       |                          | ACACCCTCTCATCTAGTAGAAGATC  | MYB                        | 4602.1  | 0.68        |        |
| 138       |                          | ATGGACCACCCTTACTGAAGAAAAT  | MYB                        | 4602.1  | 0.7         |        |
| 139       |                          | GAGGTGGAATCTCCAACGATAAAT   | MYB                        | 4602.1  | 0.74        |        |
| 140       |                          | GAATCTCCAACGATAAATCAGGAA   | MYB                        | -       | [0.4]       |        |
| 141       |                          | AAATCAGGAAACTTCTTCTGCTCAC  | MYB                        | 4602.1  | 0.86        |        |
| 142       |                          | AACTTCTTCTGCTCACACCACTGGG  | MYB                        | 4602.1  | 0.61        |        |
| 143       | TGAATACCCAACTGTTACGCAGAC | MYB                        | 4602.1                     | 0.89    |             |        |
| 144       | ACTGTTACGCAGACCTCGCCTGTG | MYB                        | -                          | [0.53]  |             |        |
| 2042_s_at | 145                      | ACGTTTTTTGCTGCTATGGTCTTAG  | MYB                        | 4602.1  | 0.89        |        |
|           | 146                      | TTTTGCTGCTATGGTCTTAGCCTGT  | MYB                        | 4602.1  | 0.9         |        |
|           | 147                      | TGCTGCTATGGTCTTAGCCTGTAGA  | MYB                        | 4602.1  | 0.89        |        |
|           | 148                      | GTCTTAGCCTGTAGACATGCTGCTA  | MYB                        | 4602.1  | 0.9         |        |
|           | 149                      | GCCTGTAGACATGCTGCTAGTATCA  | MYB                        | 4602.1  | 0.91        |        |
|           | 150                      | GTAGACATGCTGCTAGTATCAGAGG  | MYB                        | 4602.1  | 0.89        |        |
|           | 151                      | ACATGCTGCTAGTATCAGAGGGGCA  | MYB                        | -       | [0.53]      |        |
|           | 152                      | TGCTGCTAGTATCAGAGGGGCAGTA  | MYB                        | -       | [0.39]      |        |
|           | 153                      | TATCAGAGGGGCAGTAGAGCTTGGA  | MYB                        | -       | [0.53]      |        |

| probe_set | Probe # | sequence                   | Remap | Cleaner | consistency |
|-----------|---------|----------------------------|-------|---------|-------------|
|           | 154     | TGACTATGCACTAGTATTTTCAGACT | MYB   | 4602.1  | 0.88        |
|           | 155     | TATGCACTAGTATTTTCAGACTTTTT | MYB   | 4602.1  | 0.86        |
|           | 156     | GCACTAGTATTTTCAGACTTTTTAAT | MYB   | 4602.1  | 0.84        |
|           | 157     | TTCTTCTGCAATACATTTGAAAAC   | MYB   | 4602.1  | 0.85        |
|           | 158     | TTCTGCAATACATTTGAAAAC TTGT | MYB   | -       | [0.22]      |
|           | 159     | TTTGAAAAC TTGTTTGGGAGACTCT | MYB   | -       | [0.22]      |
|           | 160     | ACTTGTTTGGGAGACTCTGCATTTT  | MYB   | 4602.1  | 0.74        |
|           | 161     | TTTTCTTCAGAAGGACTATAATCAG  | -     | -       | -           |
|           | 162     | AAGACCCTGAGAAGGAAAAGCGAAT  | MYB   | -       | [0.04]      |
|           | 163     | GAATTAGAATTGCTCCTAATGTCAA  | MYB   | -       | [0.43]      |
|           | 164     | AGGTGCTACCAGTAAGACTGTCATC  | -     | -       | -           |
|           | 165     | TACCAGTAAGACTGTCATCATGTGC  | -     | -       | -           |
|           | 166     | CTGTCATCATGTGCTTGAATGAGGG  | -     | -       | -           |
|           | 167     | GGGATAGCAGCTTTGCCTCAGTTTA  | -     | -       | -           |
| 41854_at  | 168     | AGCAGCTTTGCCTCAGTTTACCTAA  | -     | -       | -           |
|           | 169     | TGCCTCAGTTTACCTAAGCGCTCTT  | -     | -       | -           |
|           | 170     | GCCTCAGTTTACCTAAGCGCTCTTC  | -     | -       | -           |
|           | 171     | AGCAAGGCTCCATATATCCATTCAG  | -     | -       | -           |
|           | 172     | AGGCTCCATATATCCATTCAGAATG  | -     | -       | -           |
|           | 173     | ATTCAGAATGTCTCAACACAAGAAG  | -     | -       | -           |
|           | 174     | CAGAATGTCTCAACACAAGAAGTTG  | -     | -       | -           |
|           | 175     | GTCTCAACACAAGAAGTTGCTTGTA  | -     | -       | -           |
|           | 176     | CAACACAAGAAGTTGCTTGTAGTAA  | -     | -       | -           |
